# Supplementary material
Source: PubMed Central journal article supplement (PMC7115370)
Supplement: mmc1.pdf [file mmc1.pdf]

# APPENDICES

## Rotavirus incidence in hospitalised Hong Kong children: 1 July 1997 to 31 March 2011

### Authors

Grace P.K. Chiang<sup>a</sup>

E. Anthony S. Nelson<sup>a \*</sup>

Timothy J.H.S. Pang<sup>b</sup>

Shu Kei Law<sup>c</sup>

W. Goggins<sup>c</sup>

Johnny Y.C. Chan<sup>d</sup>

Margaret Ip<sup>e</sup>

Paul K.S. Chan<sup>e</sup>

<sup>a</sup> Department of Paediatrics, The Chinese University of Hong Kong, Hong Kong Special Administrative Region

<sup>b</sup> London School of Hygiene and Tropical Medicine, United Kingdom

<sup>c</sup> Division of Biostatistics, School of Public Health and Primary Care, The Chinese University of Hong Kong, Hong Kong Special Administrative Region

<sup>d</sup> Department of Paediatrics, Kwong Wah Hospital, Hong Kong Special Administrative Region

<sup>e</sup> Department of Microbiology, The Chinese University of Hong Kong, Hong Kong Special Administrative Region

\* Corresponding author at: Department of Paediatrics, The Chinese University of Hong Kong, 6/F Clinical Science Building, Prince of Wales Hospital, Shatin, Hong Kong Special Administrative Region. Tel.: +852 26360020; fax: +852 26322861; mobile: +852 97861191.

E-mail address: tony-nelson@cuhk.edu.hk (E.A.S. Nelson).

## Appendix 1 – Number of in-patients\* in public and private hospitals by age group, 2008-2010

| Type               | Age group | 2008    |            | 2009    |            | 2010    |            | Average (2008-2010) |
|--------------------|-----------|---------|------------|---------|------------|---------|------------|---------------------|
|                    |           | Number  | Percentage | Number  | Percentage | Number  | Percentage | Number (% of total) |
| Public ^ hospitals | Under 1   | 73,788  | 5.8        | 74,815  | 5.6        | 81,790  | 5.7        | 76,797(63.1)        |
|                    | 1-4       | 32,695  | 2.6        | 33,868  | 2.5        | 37,171  | 2.6        | 34,578(72.3)        |
|                    | 5-14      | 36,407  | 2.9        | 37,680  | 2.8        | 37,609  | 2.6        | 37,232(77.2)        |
|                    | 15-44     | 274,227 | 21.6       | 280,023 | 20.9       | 288,526 | 20.3       | 280,925(64.4)       |
|                    | 45-64     | 320,446 | 25.3       | 359,634 | 26.8       | 386,455 | 27.1       |                     |
| Private hospitals  | Under 1   | 41,004  | 12.0       | 44,746  | 12.4       | 49,002  | 12.8       |                     |
|                    | 1-4       | 12,776  | 3.7        | 12,352  | 3.4        | 14,525  | 3.8        |                     |
|                    | 5-14      | 11,089  | 3.2        | 10,532  | 2.9        | 11,362  | 3.0        |                     |
|                    | 15-44     | 150,657 | 44.1       | 155,436 | 43.0       | 159,911 | 41.9       |                     |
| Total              | Under 1   | 114,792 | 7.1        | 119,561 | 7.0        | 130,792 | 7.2        | 121,715             |
|                    | 1-4       | 45,471  | 2.8        | 46,220  | 2.7        | 51,696  | 2.9        | 47,796              |
|                    | 5-14      | 47,496  | 2.9        | 48,212  | 2.8        | 48,971  | 2.7        | 48,226              |
|                    | 15-44     | 424,884 | 26.4       | 435,459 | 25.6       | 448,437 | 24.8       | 436,260             |

**Sources: Hospital Authority and Department of Health**

Notes:

\* On attendance basis, including discharges and deaths

^ The figures may differ slightly from those presented in Table A18 of the “Tables on Health Status and Health Services” due to different sources of data

### Summary of average number of in-patient discharges and deaths in public hospital by age group

| Type                                    | Age group | Average number of 2008-2010 |
|-----------------------------------------|-----------|-----------------------------|
| Public                                  | Under 1y  | 76,797                      |
|                                         | 1-4y      | 34,578                      |
|                                         | 5-14y     | 37,232                      |
|                                         | 15-44y    | 280,925                     |
| Total (Public + Private)                | Under 1y  | 121,715                     |
|                                         | 1-4y      | 47,796                      |
|                                         | 5-14y     | 48,226                      |
|                                         | 15-44y    | 436,260                     |
| Percentage of public hospital admission | Under 1y  | 63.1%                       |
|                                         | 1-4y      | 72.3%                       |
|                                         | 5-14y     | 77.2%                       |
|                                         | 15-44y    | 64.4%                       |

**Appendix 2 –Hong Kong resident population\* in each age group (estimated for the middle of each year) that was used to calculate incidence rates for the 14 rotavirus seasons (July to following June) of the study**

| Age group | 1997   | 1998   | 1999   | 2000   | 2001   | 2002   | 2003   | 2004   | 2005   | 2006   | 2007   | 2008   | 2009   | 2010 * |
|-----------|--------|--------|--------|--------|--------|--------|--------|--------|--------|--------|--------|--------|--------|--------|
| 0m        | 5283   | 4550   | 4267   | 4125   | 3908   | 3133   | 3300   | 3158   | 3283   | 3550   | 3425   | 3883   | 3883   | 3081   |
| 1m        | 5283   | 4550   | 4267   | 4125   | 3908   | 3133   | 3300   | 3158   | 3283   | 3550   | 3425   | 3883   | 3883   | 3081   |
| 2m        | 5283   | 4550   | 4267   | 4125   | 3908   | 3133   | 3300   | 3158   | 3283   | 3550   | 3425   | 3883   | 3883   | 3081   |
| 3m        | 5283   | 4550   | 4267   | 4125   | 3908   | 3133   | 3300   | 3158   | 3283   | 3550   | 3425   | 3883   | 3883   | 3081   |
| 4m        | 5283   | 4550   | 4267   | 4125   | 3908   | 3133   | 3300   | 3158   | 3283   | 3550   | 3425   | 3883   | 3883   | 3081   |
| 5m        | 5283   | 4550   | 4267   | 4125   | 3908   | 3133   | 3300   | 3158   | 3283   | 3550   | 3425   | 3883   | 3883   | 3081   |
| 6-11m     | 31698  | 27300  | 25602  | 24750  | 23448  | 18798  | 19800  | 18948  | 19698  | 21300  | 20550  | 23298  | 23298  | 18486  |
| 1-<2y     | 67896  | 63504  | 54096  | 50100  | 47700  | 48000  | 38496  | 41004  | 39000  | 37500  | 43800  | 42204  | 48204  | 36225  |
| 2-<3y     | 76296  | 69096  | 65100  | 55404  | 51000  | 50400  | 50196  | 41496  | 43500  | 40104  | 38604  | 45000  | 42996  | 37350  |
| 3-<4y     | 75396  | 77004  | 72000  | 66396  | 57996  | 54600  | 52404  | 53004  | 44196  | 46200  | 42096  | 41796  | 47604  | 34803  |
| 4-<5y     | 80196  | 75504  | 79896  | 73296  | 69204  | 61104  | 56604  | 54300  | 54996  | 46596  | 48996  | 45204  | 43800  | 37953  |
| 5-<10y    | 390600 | 399108 | 402192 | 401508 | 396408 | 389604 | 372408 | 355608 | 332784 | 314088 | 295404 | 282504 | 265284 | 191484 |
| 10-,14y   | 332292 | 329004 | 341604 | 348108 | 345312 | 346812 | 338700 | 334392 | 329892 | 327996 | 326196 | 315600 | 295104 | 206775 |
| 14-<18y   | 369600 | 369396 | 366204 | 355992 | 345804 | 342300 | 343908 | 346596 | 348204 | 348996 | 344700 | 341496 | 338796 | 252675 |

\*Since August 2000, the “resident population” approach has been adopted in place of the “extended de facto” approach for compiling Hong Kong population figures. Revised population figures backdated to 1996 have been compiled. The population estimate compiled under the “resident population” approach is referred to as the “Hong Kong Resident Population”. The “Hong Kong Resident Population” comprises “Usual Residents” and “Mobile Residents”. (<http://www.censtatd.gov.hk/hkstat/sub/sc150.jsp>)

^ Population adjusted to account for shorter final study year 1 July 2010 to 31 March 2011 (9 months)

Source: Hong Kong Census and Statistics Department

### Appendix 3 – Calculation of adjustment factors

The adjustment factors were derived by linking the PWH laboratory surveillance data (LAB rotavirus + or –) with the PWH CMS data (CMS rotavirus + or –):

**Adjustment Factor 1 : Use MEAN for data below 5 years of age (black line)**

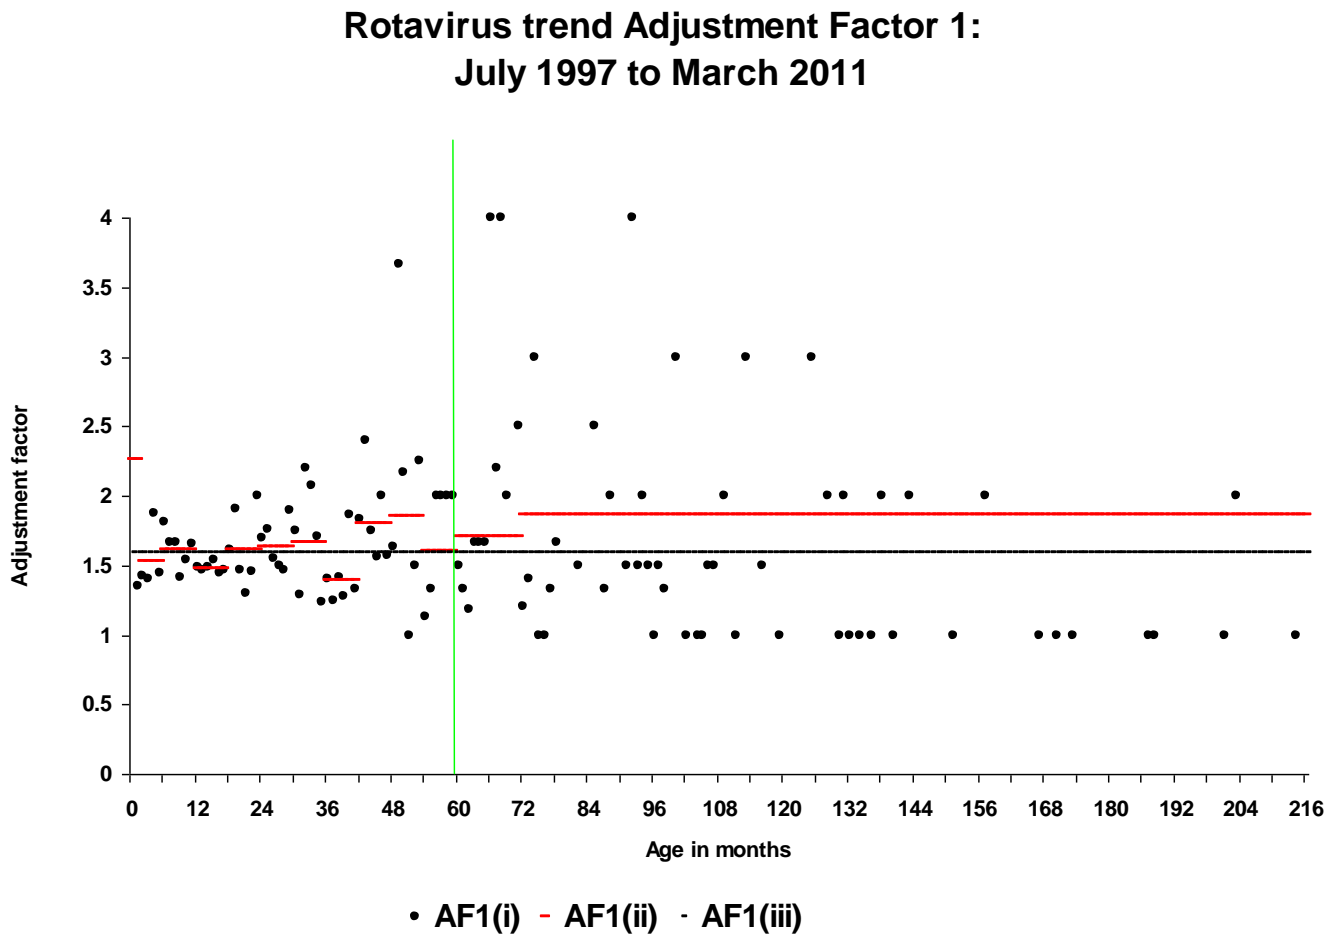

*Formula for adjustment factor 1 = LAB rotavirus+ / CMS rotavirus+*

**Adjustment Factor 2 : Use SMOOTHED values for data below 5 years of age (excluding data from the first month of life) (light blue line)**

### Rotavirus trend Adjustment Factor 2: July 1997 to March 2011

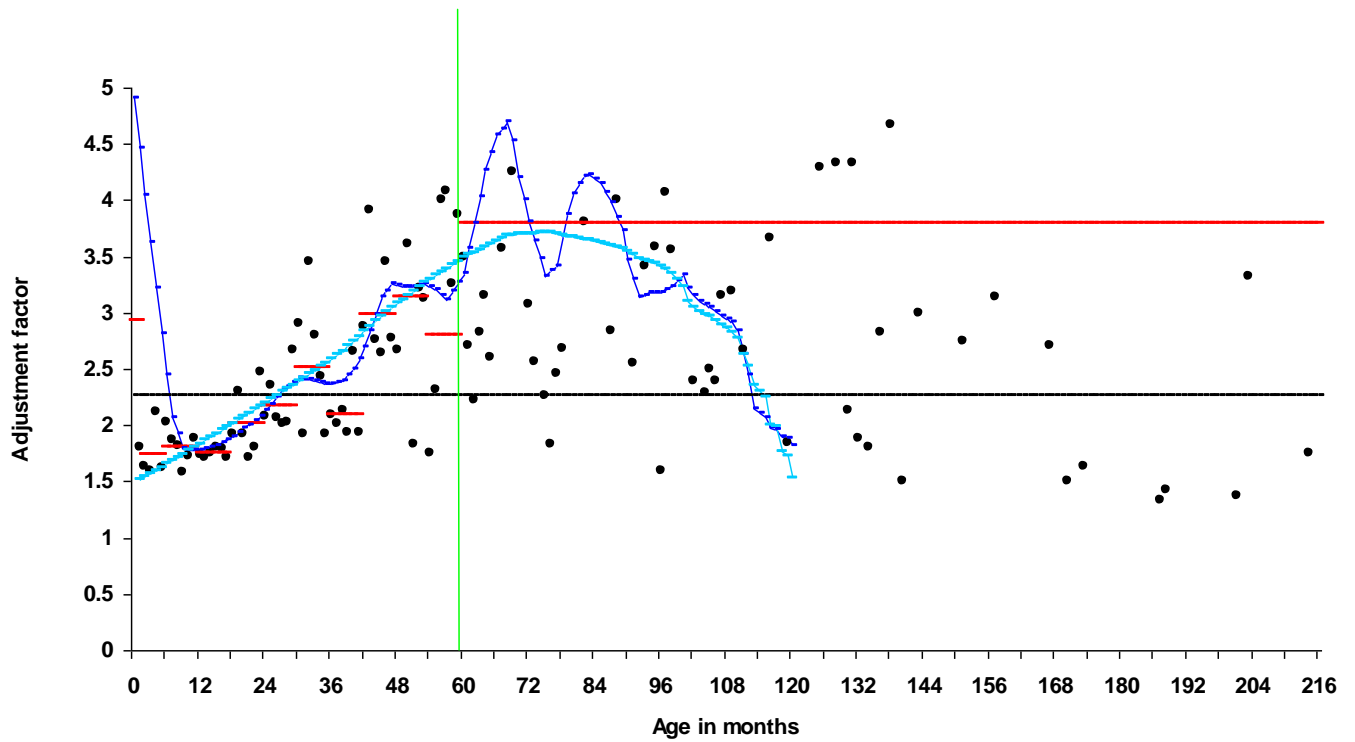

- AF2(i) - AF2(ii) - AF2(iii) - AF2(iv) -smoothed - AF2(v) - Minus 1m

*Formula for adjustment factor 2 = ([LAB rotavirus+] + [Primary gastroenteritis associated diagnosis & stool NOT sent \* {LAB rotavirus+ / stool sent}]) / CMS rotavirus+*

*Note: Not all the laboratory confirmed rotavirus cases had gastroenteritis-associated CMS diagnoses.*

**Adjustment Factor 3 : Use SMOOTHED values for data below 5 years of age (excluding data for the first month of life) (light blue line)**

### Rotavirus trend Adjustment Factor 3: July 1997 to March 2011

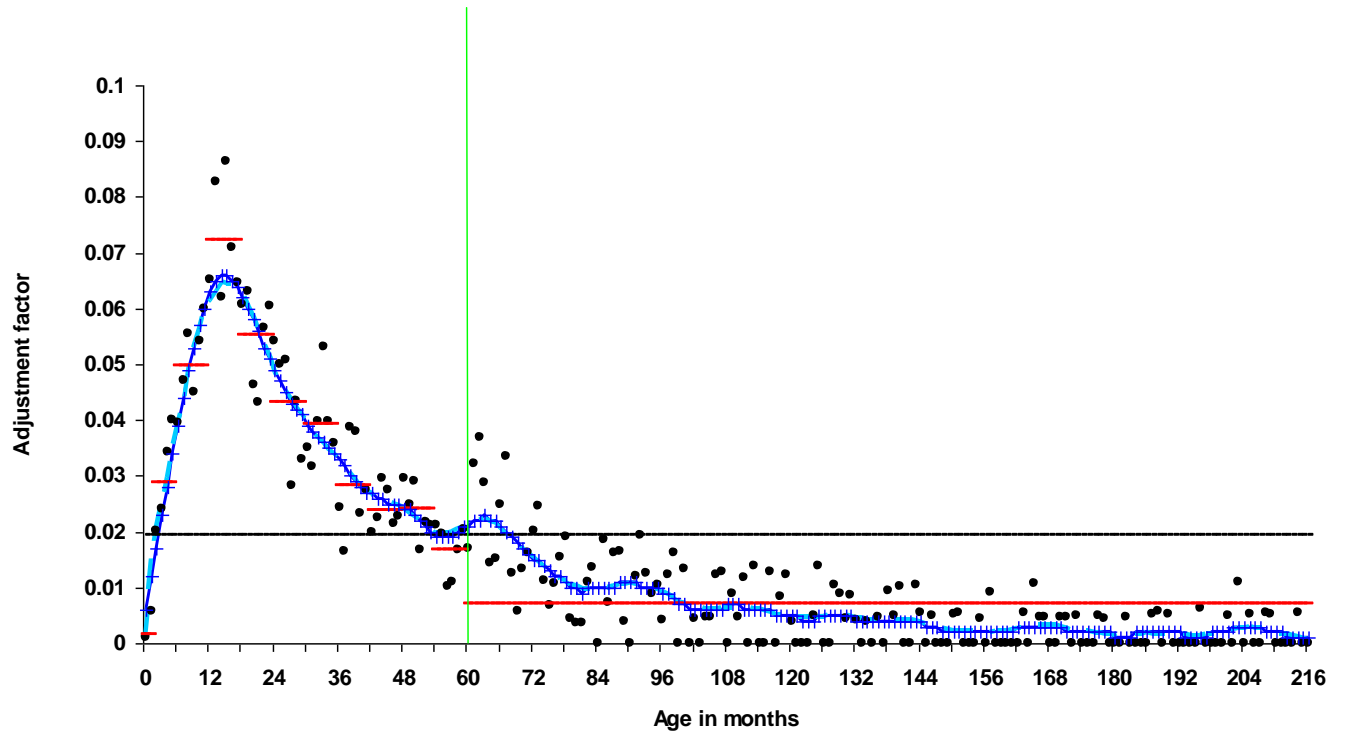

- AF3(i) - AF3(ii) - AF3(iii) - AF3(iv) - smoothed - AF3(v) - Minus 1m

*Formula for adjustment factor 3 = LAB rotavirus+ / total admissions by age group*

**Appendix 4 – Diarrhoea-associated hospitalisations by reported diagnosis in Hong Kong Hospital Authority Hospitals (1 July 1997 to 31 March 2011)**

| Aetiology                              | ICD codes    | Primary diagnosis† | Primary or secondary diagnosis‡ |
|----------------------------------------|--------------|--------------------|---------------------------------|
| <b>0 - &lt;5 years : n=824,514</b>     |              |                    |                                 |
| Not specified: Presumed infectious     | 009.0-009.3  | 28,755 (3.5%)      | 34,598 (4.2%)                   |
| Not specified: Presumed non-infectious | 558.9-789.91 | 16,847 (2.0%)      | 20,458 (2.5%)                   |
| Viral*                                 | 008.6-008.8  | 6,417 (0.8%)       | 7,705 (0.9%)                    |
| Rotavirus                              | 008.61       | 10,473 (1.3%)      | 12,193 (1.5%)                   |
| Cholera                                | 001-001.9    | 13 (0.0)           | 13 (0.0)                        |
| <i>Salmonella</i> species              | 002-003.9    | 6,331 (0.8%)       | 7,400 (0.9%)                    |
| <i>Shigella</i>                        | 004-004.9    | 145 (0.0)          | 159 (0.0)                       |
| Food poisoning                         | 005-005.9    | 141 (0.0)          | 149 (0.0)                       |
| <i>Escherichia coli</i> and others     | 008-008.5    | 1,398 (0.2%)       | 1,740 (0.2%)                    |
| Total diarrhoea                        |              | 81,111 (9.8%)      | 97,211 (11.8%)                  |
| Total of all other diseases            |              | 743,403 (90.2%)    | 727,303 (88.2%)                 |
| <b>0 - &lt;18 years : n=1,248,297</b>  |              |                    |                                 |
| Not specified: Presumed infectious     | 009.0-009.3  | 35,550 (2.8%)      | 42,531 (3.4%)                   |
| Not specified: Presumed non-infectious | 558.9-789.91 | 20,463 (1.6%)      | 24,706 (2.0%)                   |
| Viral*                                 | 008.6-008.8  | 7,494 (0.6%)       | 8,987 (0.7%)                    |
| Rotavirus                              | 008.61       | 11,646 (0.9%)      | 13,495 (1.1%)                   |
| Cholera                                | 001-001.9    | 20 (0.0%)          | 20 (0.0%)                       |
| <i>Salmonella</i> species              | 002-003.9    | 7,106 (0.6%)       | 8,285 (0.7%)                    |
| <i>Shigella</i>                        | 004-004.9    | 341 (0.0%)         | 368 (0.0%)                      |
| Food poisoning                         | 005-005.9    | 424 (0.0%)         | 436 (0.0%)                      |
| <i>Escherichia coli</i> and others     | 008-008.5    | 1,818 (0.1%)       | 2,260 (0.2%)                    |
| Total diarrhoea                        |              | 104,527 (8.4%)     | 124,728 (10.0%)                 |
| Total of all other diseases            |              | 1,143,770 (91.6%)  | 1,123,569 (90.0%)               |

\* Excludes rotavirus

† Primary diagnosis code only

‡ Primary or secondary diagnostic codes, with category selected hierarchically when more than one diarrhoea-related code used i.e. first diagnostic code would take precedence over the second one.

**Appendix 5 – Number of hospital admissions, by hospital, for rotavirus-associated diarrhoea among children hospitalized for any diarrhoea (primary diagnosis or any one of 9 secondary diagnoses) in Hong Kong Hospital Authority Hospitals (1 July 1997 to 31 March 2011)**

| Hospital                                                  | Total number of admissions | Total No. (%) diarrhoea-associated admissions | Total No. (%) rotavirus admissions |
|-----------------------------------------------------------|----------------------------|-----------------------------------------------|------------------------------------|
| <b>0 - &lt;5 years : n=824,514</b>                        |                            |                                               |                                    |
| <b>Hospitals providing general paediatric services</b>    |                            |                                               |                                    |
| A                                                         | 29,618                     | 5,471 (18.5)                                  | 836 (2.8)                          |
| B                                                         | 51,367                     | 7,642 (14.9)                                  | 1,240 (2.4)                        |
| C                                                         | 91,713                     | 9,774 (10.7)                                  | 2,171 (2.4)                        |
| D                                                         | 13,415                     | 1,913 (14.3)                                  | 302 (2.3)                          |
| E                                                         | 74,561                     | 7,167 (9.6)                                   | 1,463 (2.0)                        |
| F                                                         | 74,087                     | 8,798 (11.9)                                  | 1,416 (1.9)                        |
| G                                                         | 80,256                     | 9,862 (12.3)                                  | 1,332 (1.7)                        |
| H                                                         | 55,482                     | 8,195 (14.8)                                  | 931 (1.7)                          |
| I                                                         | 100,152                    | 12,323 (12.3)                                 | 1,669 (1.7)                        |
| J                                                         | 25,978                     | 4,374 (16.8)                                  | 418 (1.6)                          |
| K                                                         | 74,306                     | 5,456 (7.3)                                   | 1,050 (1.4)                        |
| L                                                         | 30,322                     | 4,990 (16.5)                                  | 215 (0.7)                          |
| M                                                         | 98,815                     | 11,001 (11.1)                                 | 93 (0.1)                           |
| <b>Hospitals providing specialist paediatric services</b> |                            |                                               |                                    |
| N                                                         | 2,651                      | 10 (0.4)                                      | 2 (0.1)                            |
| O                                                         | 16,316                     | 26 (0.2)                                      | 7 (0.0)                            |
| P                                                         | 291                        | 6 (2.1)                                       | 0 (0.0)                            |
| Q                                                         | 4,843                      | 196(4)                                        | 2 (0.0)                            |
| R                                                         | 341                        | 7 (2.1)                                       | 0 (0)                              |
| <b>0 - &lt;18 years : n=1,248,297</b>                     |                            |                                               |                                    |
| <b>Hospitals providing general paediatric services</b>    |                            |                                               |                                    |
| A                                                         | 46,942                     | 7,252 (15.5)                                  | 951 (2.0)                          |
| B                                                         | 75,377                     | 9,965 (13.2)                                  | 1,381 (1.8)                        |
| C                                                         | 138,703                    | 11,649 (8.4)                                  | 2,336 (1.7)                        |
| D                                                         | 18,803                     | 2,303 (12.3)                                  | 332 (1.8)                          |
| E                                                         | 99,473                     | 8,829 (8.9)                                   | 1,587 (1.6)                        |
| F                                                         | 121,721                    | 11,494 (9.4)                                  | 1,524 (1.3)                        |
| G                                                         | 126,394                    | 13,012 (10.3)                                 | 1,494 (1.2)                        |
| H                                                         | 76,241                     | 10,697 (14.0)                                 | 1,069 (1.4)                        |
| I                                                         | 156,495                    | 15,838 (10.1)                                 | 1,855 (1.2)                        |
| J                                                         | 37,030                     | 5,720 (15.5)                                  | 507 (1.4)                          |
| K                                                         | 124,712                    | 7,089 (5.7)                                   | 1,172 (0.9)                        |
| L                                                         | 57,557                     | 6,881 (12.0)                                  | 250 (0.4)                          |
| M                                                         | 130,294                    | 13,567 (10.4)                                 | 101 (0.1)                          |
| <b>Hospitals providing specialist paediatric services</b> |                            |                                               |                                    |
| N                                                         | 5,653                      | 26 (0.5)                                      | 2 (0.0)                            |
| O                                                         | 25,378                     | 29 (0.1)                                      | 7 (0.0)                            |
| P                                                         | 416                        | 10 (2.4)                                      | 0 (0.0)                            |
| Q                                                         | 6,625                      | 341 (5.2)                                     | 2 (0.0)                            |
| R                                                         | 483                        | 26 (5.4)                                      | 0 (0.0)                            |



**Appendix 6 – Number of rotavirus coded (CMS ICD code 008.61) admissions (n=14,570) by age in years for all admissions below 18 years (n=1,248,297) to Hospital Authority hospitals (1 July 1997 to 31 March 2011)**

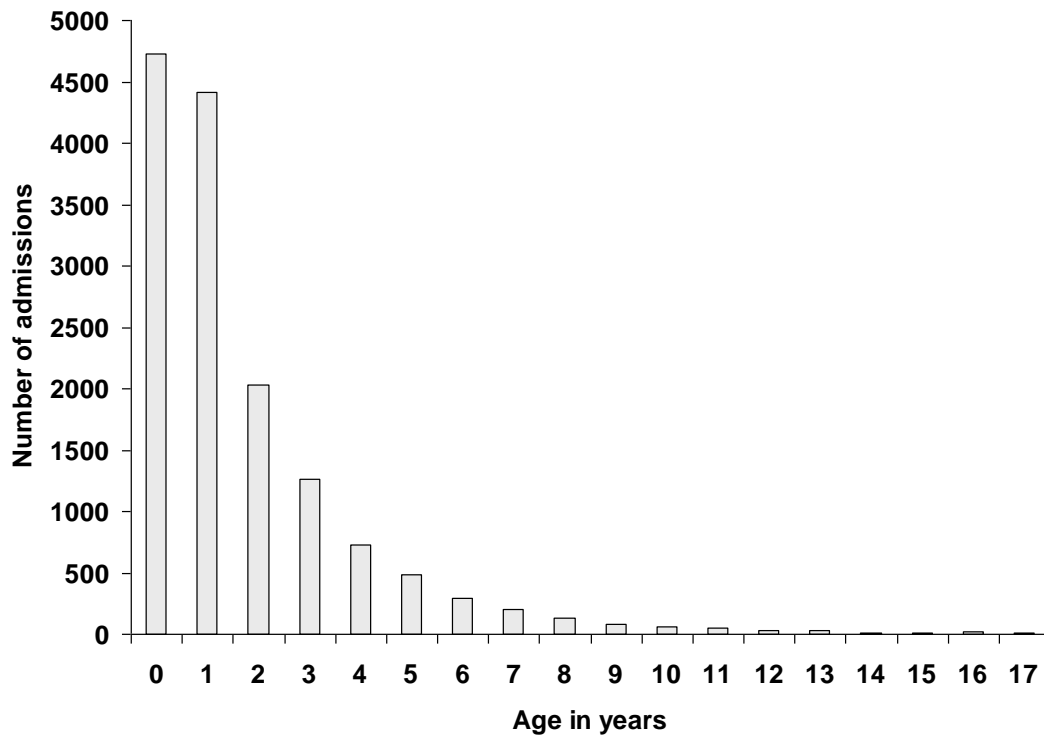

**Appendix 7 - Number of rotavirus coded (CMS ICD code 008.61) admissions (n=14,570) by month of admission for all admissions below 18 years (n=1,248,297) to Hospital Authority hospitals (1 July 1997 to 31 March 2011) \***

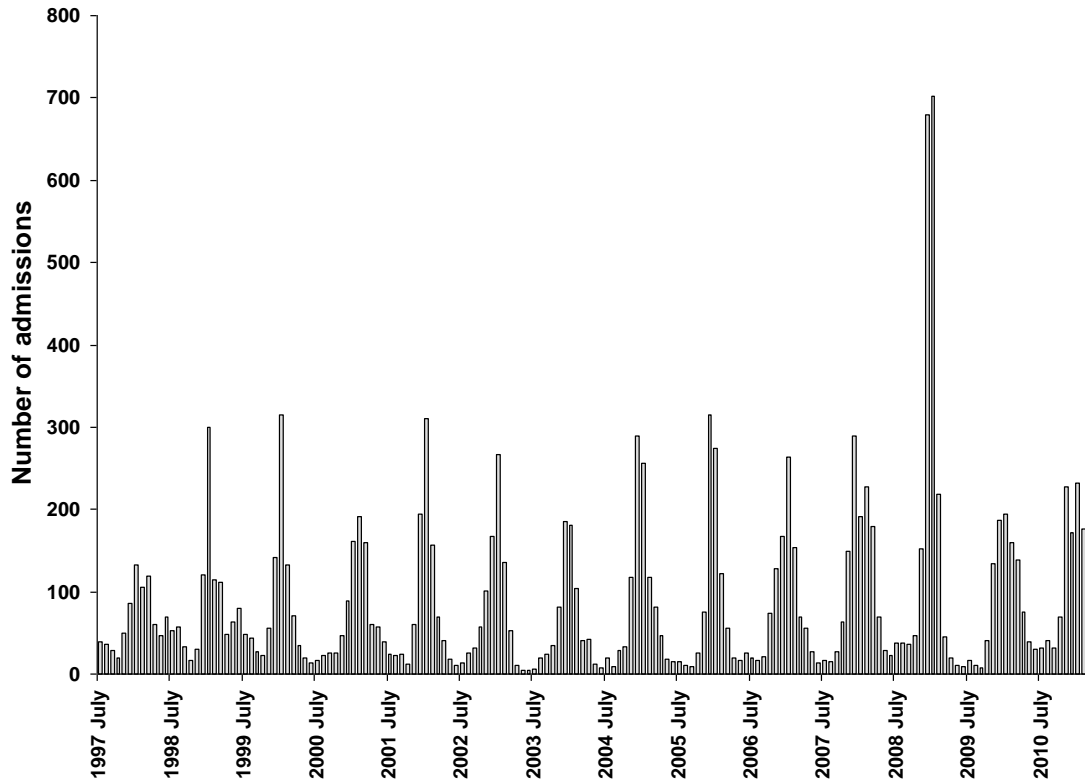

\* Each rotavirus season in the analysis starts from 1 July of the year until 30 June of the following year except for the final 2010/11 season which is from 1 July 2010 to 31 March 2011.

**Appendix 8 – Hospitalization rates of laboratory-confirmed rotavirus among children admitted to the Prince of Wales Hospital, Hong Kong (1 July 2000 to 31 March 2011)**

| Year                                | No. of admissions | No. stool specimen sent to lab | No. diagnosed rotavirus positive | Positivity rate of rotavirus from laboratory specimens (stool) | Percentage (%) of laboratory confirmed rotavirus cases as a percentage of total admissions |
|-------------------------------------|-------------------|--------------------------------|----------------------------------|----------------------------------------------------------------|--------------------------------------------------------------------------------------------|
| <b>0 - &lt;5 years : n=65,297</b>   |                   |                                |                                  |                                                                |                                                                                            |
| 2000/01                             | 4686              | 744                            | 225                              | 30.2                                                           | 4.8                                                                                        |
| 2001/02 *                           | 4775              | 890                            | 250                              | 28.1                                                           | 5.2                                                                                        |
| 2002/03 *                           | 3512              | 591                            | 200                              | 33.8                                                           | 5.7                                                                                        |
| 2003/04                             | 5291              | 530                            | 127                              | 24.0                                                           | 2.4                                                                                        |
| 2004/05                             | 6290              | 699                            | 132                              | 18.9                                                           | 2.1                                                                                        |
| 2005/06                             | 6604              | 643                            | 109                              | 17.0                                                           | 1.7                                                                                        |
| 2006/07                             | 6147              | 788                            | 147                              | 18.7                                                           | 2.4                                                                                        |
| 2007/08                             | 6534              | 670                            | 136                              | 20.3                                                           | 2.1                                                                                        |
| 2008/09                             | 7346              | 777                            | 226                              | 29.1                                                           | 3.1                                                                                        |
| 2009/10                             | 7847              | 575                            | 75                               | 13.0                                                           | 1.0                                                                                        |
| 2010/2011 ^                         | 6265              | 407                            | 83                               | 20.4                                                           | 1.3                                                                                        |
| Total                               | 65297             | 7314                           | 1710                             | 23.4                                                           | 2.6                                                                                        |
| <b>0 - &lt;18 years : n=100,330</b> |                   |                                |                                  |                                                                |                                                                                            |
| 2000/01                             | 8786              | 893                            | 252                              | 28.2                                                           | 2.9                                                                                        |
| 2001/02 *                           | 8802              | 1032                           | 285                              | 27.6                                                           | 3.2                                                                                        |
| 2002/03 *                           | 7366              | 732                            | 235                              | 32.1                                                           | 3.2                                                                                        |
| 2003/04                             | 8331              | 640                            | 141                              | 22.0                                                           | 1.7                                                                                        |
| 2004/05                             | 9415              | 845                            | 152                              | 18.0                                                           | 1.6                                                                                        |
| 2005/06                             | 9776              | 792                            | 123                              | 15.5                                                           | 1.3                                                                                        |
| 2006/07                             | 9243              | 916                            | 160                              | 17.5                                                           | 1.7                                                                                        |
| 2007/08                             | 9426              | 783                            | 159                              | 20.3                                                           | 1.7                                                                                        |
| 2008/09                             | 10001             | 925                            | 261                              | 28.2                                                           | 2.6                                                                                        |
| 2009/10                             | 10829             | 674                            | 89                               | 13.2                                                           | 0.8                                                                                        |
| 2010/2011 ^                         | 8355              | 473                            | 97                               | 20.5                                                           | 1.2                                                                                        |
| Total                               | 100330            | 8705                           | 1954                             | 22.5                                                           | 1.9                                                                                        |

\* Active surveillance during Asian Rotavirus Surveillance Network

^ Final rotavirus season covered period 1 July 2010 to 31 March 2011 (9 months)

**Appendix 9 – Length of stay and discharge status of children admitted to the Prince of Wales Hospital and to all Hospital Authority Hospitals, Hong Kong with primary diagnosis of gastroenteritis (1 July 1997 to 31 March 2011)**

| Diagnosis                                                           | Number of admissions | Median length of hospital stay (IQR) days | Discharge status (No. of patients) |                     |                        |              |
|---------------------------------------------------------------------|----------------------|-------------------------------------------|------------------------------------|---------------------|------------------------|--------------|
|                                                                     |                      |                                           | Death                              | Home with follow up | Home without follow up | DAMA ^       |
| <b>All Hospital Authority hospitals</b>                             |                      |                                           |                                    |                     |                        |              |
| <b>0 - &lt;5 years</b>                                              |                      |                                           |                                    |                     |                        |              |
| Gastroenteritis of presumed infectious and non-infectious diarrhoea | 45,602               | 3 (2-4)                                   | 3 (0.0%)                           | 12,267 (26.9%)      | 31,392 (68.8%)         | 1,793 (3.9%) |
| Viral gastroenteritis*                                              | 6,417                | 3 (3-4)                                   | 0                                  | 1,279 (19.9%)       | 4,894 (76.3%)          | 228 (3.6%)   |
| Rotavirus diarrhoea                                                 | 10,473               | 4 (3-5)                                   | 0                                  | 2,341 (22.4%)       | 7,851 (75.0%)          | 247 (2.4%)   |
| Bacterial and Parasitic gastroenteritis                             | 8,031                | 4 (3-6)                                   | 0                                  | 2,999 (37.3%)       | 4,800 (59.8%)          | 201 (2.5%)   |
| Vomiting and gastritis                                              | 10,588               | 3 (2-3)                                   | 0                                  | 2,717 (25.7%)       | 7,334 (69.3%)          | 479 (4.5%)   |
| ALL GE (total)                                                      | 81,111               | 3 (2-4)                                   | 3 (0.0%)                           | 21,603 (26.6%)      | 56,271 (69.4%)         | 2,948 (3.6%) |
| <b>0 - &lt;18 years</b>                                             |                      |                                           |                                    |                     |                        |              |
| Gastroenteritis of presumed infectious and non-infectious diarrhoea | 56,013               | 3 (2-4)                                   | 4 (0.0%)                           | 15,096 (27.0%)      | 38,690 (69.1%)         | 2,017 (3.6%) |
| Viral gastroenteritis*                                              | 7,494                | 3 (2-4)                                   | 0                                  | 1,515 (20.2%)       | 5,700 (76.1%)          | 246 (3.3%)   |
| Rotavirus diarrhoea                                                 | 11,646               | 4 (3-5)                                   | 0                                  | 2,569 (22.1%)       | 8,779 (75.4%)          | 264 (2.3%)   |
| Bacterial and Parasitic gastroenteritis                             | 9,717                | 4 (3-6)                                   | 0                                  | 3,578 (36.8%)       | 5,862 (60.3%)          | 232 (2.4%)   |
| Vomiting and gastritis                                              | 19,657               | 3 (2-3)                                   | 1 (0.0%)                           | 5,889 (30.0%)       | 13,014 (66.2%)         | 638 (3.3%)   |
| ALL GE (total)                                                      | 104,527              | 3 (2-4)                                   | 5 (0.0%)                           | 28,647 (27.4%)      | 72,045 (68.9%)         | 3397 (3.3%)  |
| <b>Prince of Wales Hospital</b>                                     |                      |                                           |                                    |                     |                        |              |
| <b>0 - &lt;5 years</b>                                              |                      |                                           |                                    |                     |                        |              |
| Gastroenteritis of presumed infectious and non-infectious diarrhoea | 4,808                | 3 (2-4)                                   | 0                                  | 708 (14.7%)         | 3,920 (81.5%)          | 174 (3.6%)   |
| Viral gastroenteritis*                                              | 1,026                | 3 (2-4)                                   | 0                                  | 114 (11.1%)         | 882 (86.0%)            | 30 (2.9%)    |
| Rotavirus diarrhoea                                                 | 1,119                | 4 (3-6)                                   | 0                                  | 151 (13.5%)         | 955 (85.3%)            | 12 (1.1%)    |
| Bacterial and Parasitic gastroenteritis                             | 598                  | 5 (3-8)                                   | 0                                  | 162 (27.1%)         | 428 (71.6%)            | 8 (1.3%)     |
| Vomiting and gastritis                                              | 1,355                | 3 (2-4)                                   | 0                                  | 282 (20.8%)         | 1,012 (74.7%)          | 61 (4.5%)    |
| ALL GE (total)                                                      | 8,906                | 3 (2-5)                                   | 0                                  | 1,417 (15.9%)       | 7,197 (80.8%)          | 285 (3.2%)   |
| <b>0 - &lt;18 years</b>                                             |                      |                                           |                                    |                     |                        |              |
| Gastroenteritis of presumed infectious and non-infectious diarrhoea | 5,999                | 3 (2-4)                                   | 1 (0.0%)                           | 951 (15.9%)         | 4,849 (80.8%)          | 191 (3.2%)   |
| Viral gastroenteritis*                                              | 1,283                | 3 (2-4)                                   | 0                                  | 147 (11.5%)         | 1,101 (85.8%)          | 35 (2.7%)    |
| Rotavirus diarrhoea                                                 | 1,252                | 4 (3-6)                                   | 0                                  | 165 (13.2%)         | 1,073 (85.7%)          | 13 (1.0%)    |
| Bacterial and Parasitic gastroenteritis                             | 717                  | 5 (3-8)                                   | 0                                  | 188 (26.2%)         | 520 (72.5%)            | 9 (1.3%)     |
| Vomiting and gastritis                                              | 2,496                | 3 (2-4)                                   | 1 (0.0%)                           | 570 (22.8%)         | 1,850 (74.1%)          | 75 (3.0%)    |
| ALL GE (total)                                                      | 11,747               | 3 (2-4)                                   | 2 (0.0%)                           | 2,021 (17.2%)       | 9,393 (80.0%)          | 323 (2.8%)   |

\*Excludes rotavirus

^Discharge with acknowledgement to medical advice
